# Supplementary material for: Genome-wide uniformity of human ‘open’ pre-initiation complexes
Source: PubMed Central journal article supplement (PMC5204339; doi:10.1101/gr.210955.116), 2017-01
Supplement: supp_gr.210955.116_Supplemental_Fig_S2.pdf [file supp_gr.210955.116_Supplemental_Fig_S2.pdf]

## Supplemental Fig S2

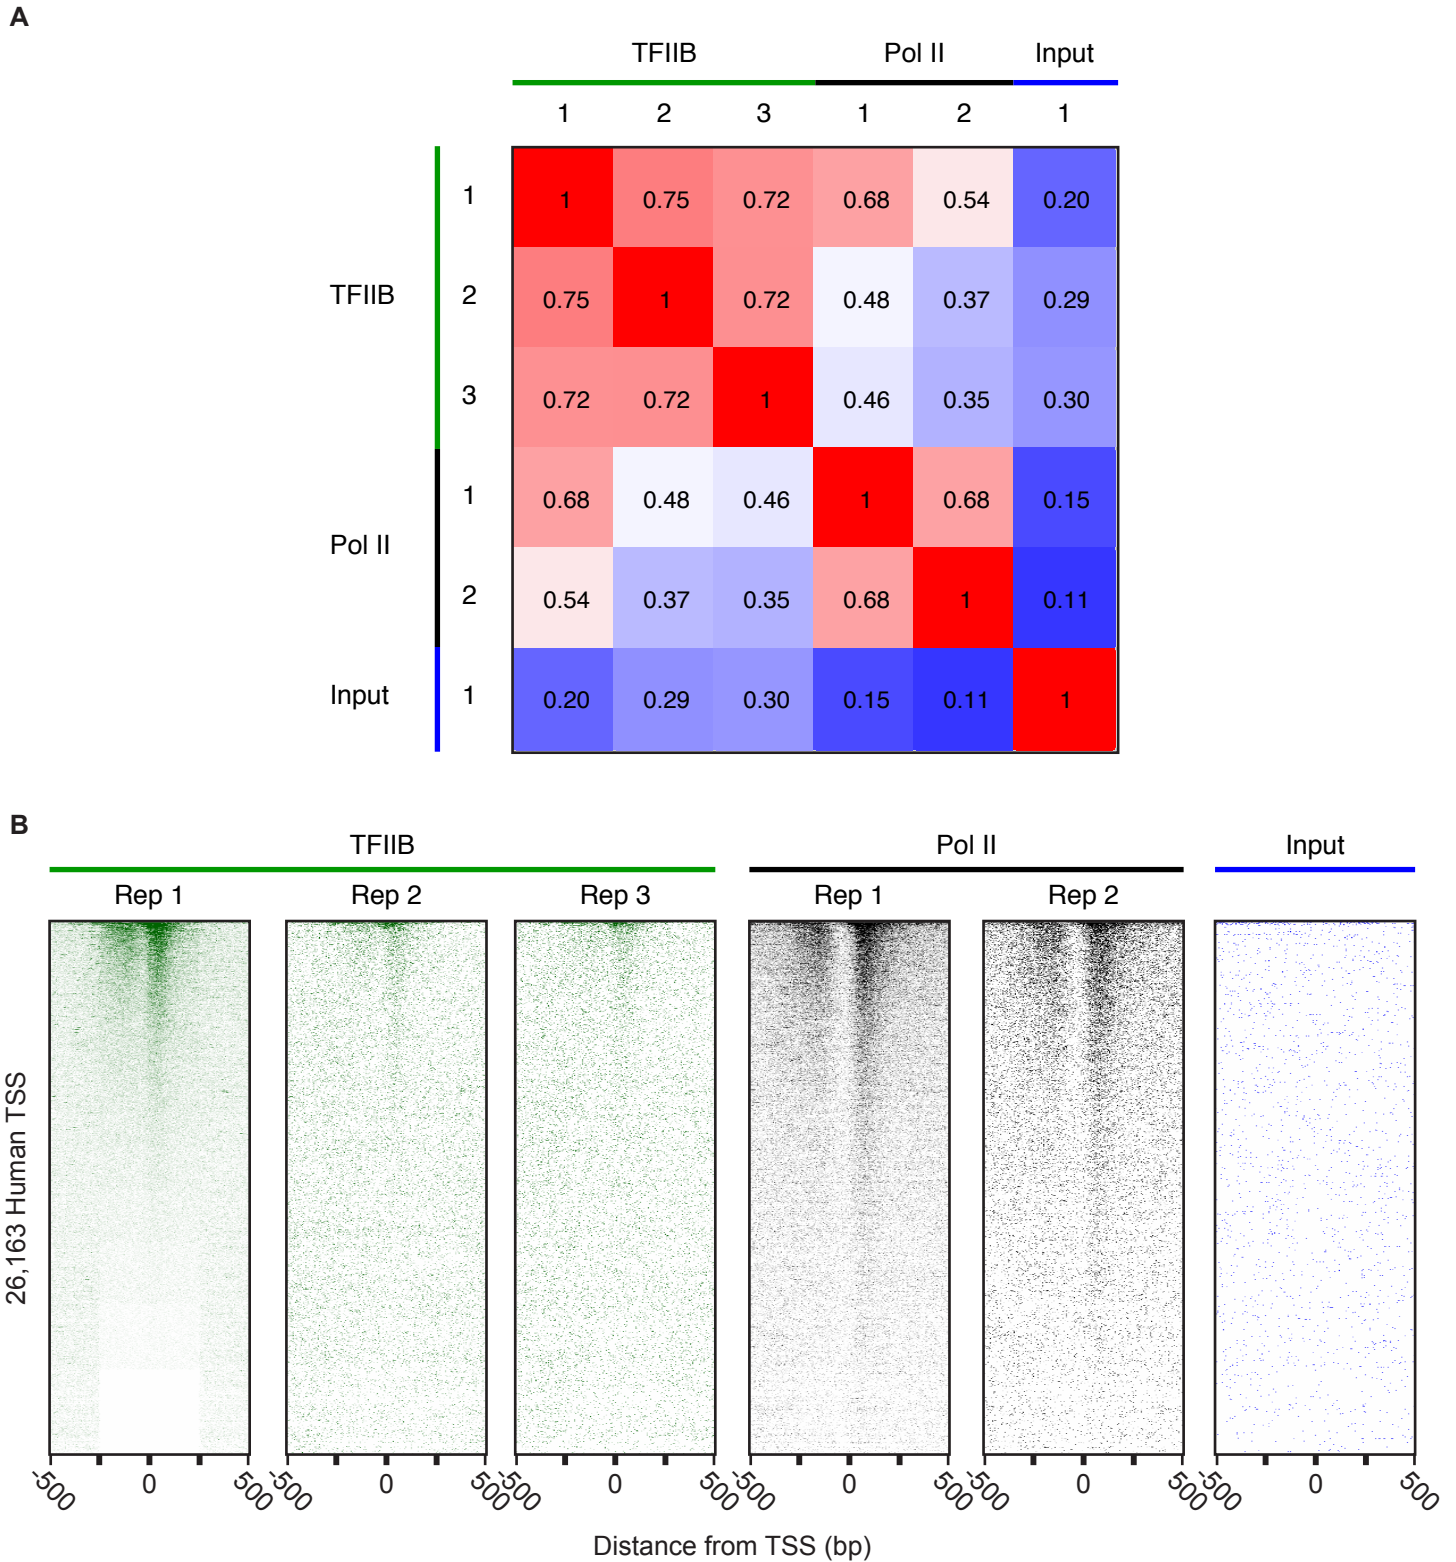

**Supplemental Figure S2. Replicate correlation validation.** (A) Pearson correlation matrix of the total tag count of TFIIB Rep 1, Rep 2, Rep 3, Pol II Rep 1, Rep 2, and Input in a 500 bp window centered at annotated human TSSs (N=26,163) (B) Heatmaps of all PIP-seq replicates in a 1kb window aligned relative to human TSSs (N=26,163) and sorted by total tag count of TFIIB replicate 1 in 500 bp window centered on TSS.
