# Supplementary material for: Genome-wide uniformity of human ‘open’ pre-initiation complexes
Source: PubMed Central journal article supplement (PMC5204339; doi:10.1101/gr.210955.116), 2017-01
Supplement: supp_gr.210955.116_Supplemental_Fig_S7.pdf [file supp_gr.210955.116_Supplemental_Fig_S7.pdf]

## Supplemental Fig 7

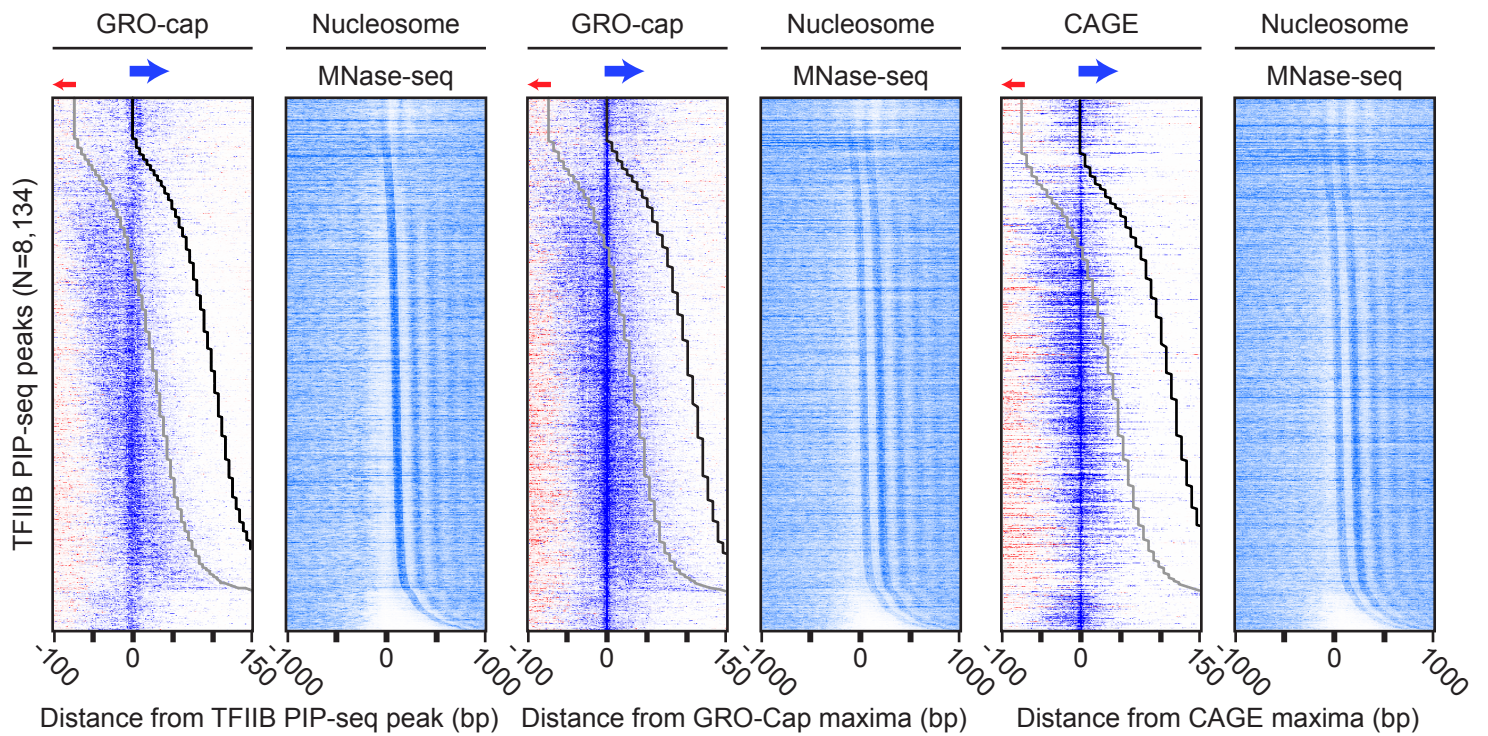

**Supplemental Figure 7. Dispersion validation.** Heatmaps of GRO-cap and CAGE with three distinct reference points: TFIIB PIP-seq peak, GRO-Cap local maxima, and CAGE local maxima. All heatmaps were independently sorted with respect to closest downstream +1 nucleosome determined as previously described.
