# Supplementary material for: Genome-wide uniformity of human ‘open’ pre-initiation complexes
Source: PubMed Central journal article supplement (PMC5204339; doi:10.1101/gr.210955.116), 2017-01
Supplement: supp_gr.210955.116_Supplemental_Fig_S9.pdf [file supp_gr.210955.116_Supplemental_Fig_S9.pdf]

## Supplemental Fig S9

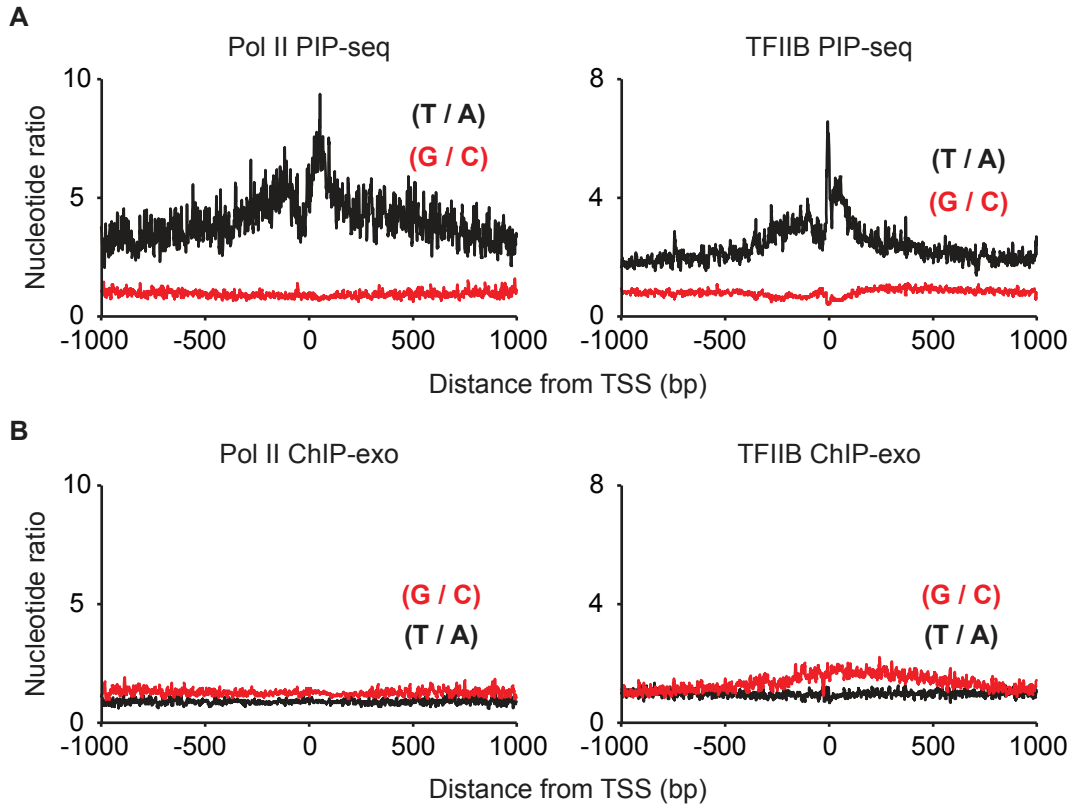

**Supplemental Figure S9. PIP-seq strand normalization validation.** (A) Pol II and TFII B PIP-seq -1 'T' tag counts were aligned relative to annotated human TSSs (N=26,163), smoothed with a 7 bp sliding window average, and then locally normalized (divided) by -1 'A' tag counts treated similarly (T/A) so as to report on the relative T-reactivity relative to the equally occurring "A" nucleotide, as a readout of single-stranded DNA. Similar control plots were made for 'G' and 'C' tags (G/C). (B) Pol II and TFII B ChIP-exo -1 'N' tags were normalized similarly as panel A.
