# Supplementary material for: Genome-wide uniformity of human ‘open’ pre-initiation complexes
Source: PubMed Central journal article supplement (PMC5204339; doi:10.1101/gr.210955.116), 2017-01
Supplement: supp_gr.210955.116_Supplemental_Table_S1.pdf [file supp_gr.210955.116_Supplemental_Table_S1.pdf]

**Supplementary Table S1: Sequencing Experiment Statistics**

|        | <b>Assay</b> | <b>Replicate</b> | <b>Total Tags</b> | <b>Total 'T' Tags</b> |
|--------|--------------|------------------|-------------------|-----------------------|
| Pol II | PIP-seq      | 1                | 62,908,427        | 26,593,623            |
| Pol II | PIP-seq      | 2                | 11,845,451        | 4,949,154             |
| TFIIB  | PIP-seq      | 1                | 43,354,508        | 15,486,376            |
| TFIIB  | PIP-seq      | 2                | 18,579,509        | 7,258,212             |
| TFIIB  | PIP-seq      | 3                | 12,444,571        | 4,809,101             |
| Input  | PIP-seq      | 1                | 4,203,956         | 1,309,290             |
| Pol II | ChIP-exo     | 1                | 19,743,244        | -                     |
| TFIIB  | ChIP-exo     | 1                | 14,723,536        | -                     |
